# Supplementary material for: EARLY OUTPATIENT TREATMENT OF COVID-19: A RETROSPECTIVE ANALYSIS OF 392 CASES IN ITALY
Source: bioRxiv or medRxiv preprint supplement (doi:10.1101/2022.04.04.22273356), 2022-04-05
Supplement: Supplementary file [file media-1.pdf]

## **Appendix 1**

### **IppocrateOrg Association Working Group for the Early Outpatient Treatment of COVID-19**

#### **Members:**

Barbara Allasino, Turin (b.allasino@libero.it)

Maria Balzola, Milan (mariabalzola@gmail.com)

Marina Basile, Catania (marinabasile@hotmail.com)

Rosalia Billeci, Palermo (r.billeci@gmail.com)

Fabio Burigana, Trieste (fburigana@gmail.com)

Alberto Dallari, Reggio Emilia (albertodallari@icloud.com)

Carlo Servo Florio Pagano, Verona (carloservofloriopagano@gmail.com)

Antonio Palma, Milan (dott.antoniopalma@gmail.com)

Simona Fontana, Como (fontana.simona@yahoo.com)

Massimo Veneziano, Genova (maxge@live.it)
